# Supplementary material for: APOE traffics to astrocyte lipid droplets and modulates triglyceride saturation and droplet size
Source: PubMed Central journal article supplement — J Cell Biol. 2024 Feb 9;223(4):e202305003. doi: 10.1083/jcb.202305003 (PMC10857907; doi:10.1083/jcb.202305003), 2024-02-09
Supplement: JCB_202305003_SourceDataF4.pdf [file JCB_202305003_SourceDataF4.pdf]

**Figure 4B**

Primary antibody: Chicken anti-GFP  
Secondary antibody Donkey anti-chicken IgG IRDye 680RD

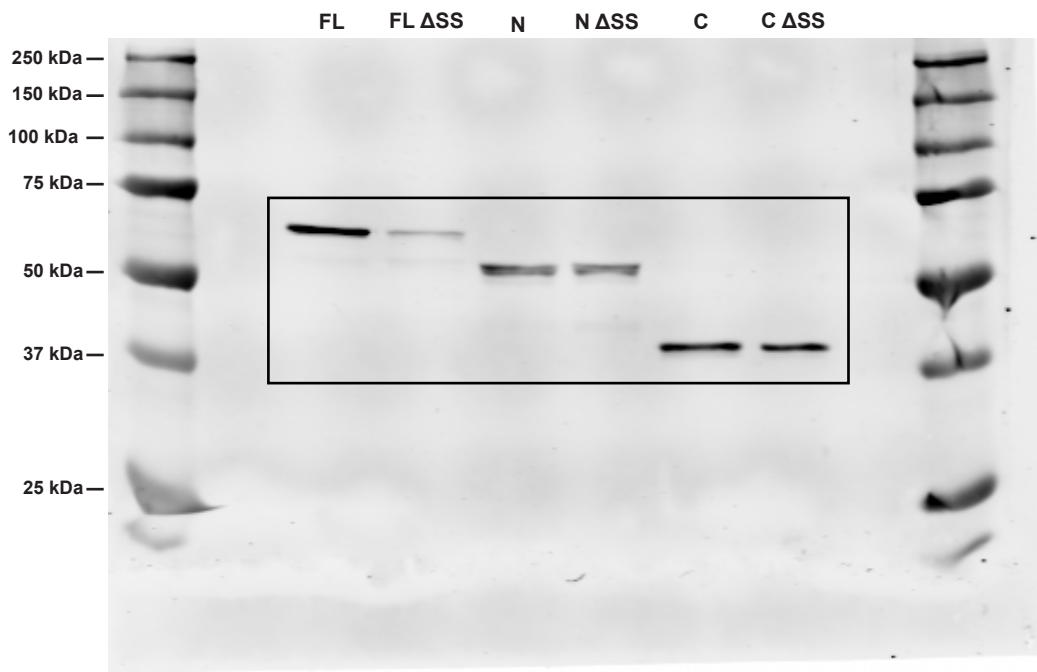

Primary antibody: Mouse anti- $\alpha$ -tubulin  
Secondary antibody Donkey anti-mouse IgG IRDye 800CW

FL FL ΔSS N N ΔSS C C ΔSS

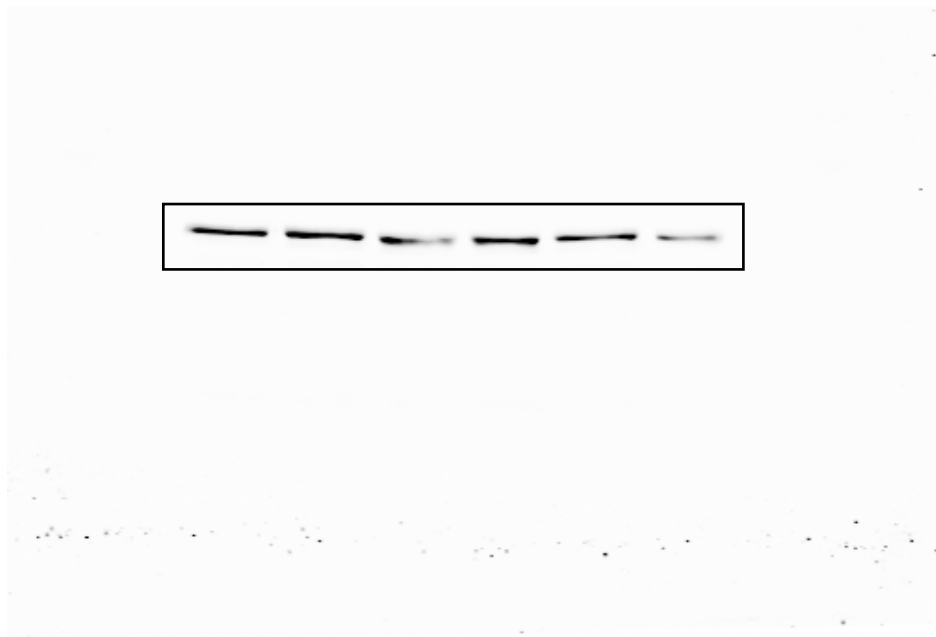

Source Data for Figure 4
