# Supplementary material for: APOE traffics to astrocyte lipid droplets and modulates triglyceride saturation and droplet size
Source: PubMed Central journal article supplement — J Cell Biol. 2024 Feb 9;223(4):e202305003. doi: 10.1083/jcb.202305003 (PMC10857907; doi:10.1083/jcb.202305003), 2024-02-09
Supplement: JCB_202305003_SourceDataFS1.pdf [file JCB_202305003_SourceDataFS1.pdf]

**Supplementary Figure 1A**

Primary antibody: Rabbit anti-APOE  
Secondary antibody Donkey anti-rabbit IgG IRDye 680RD

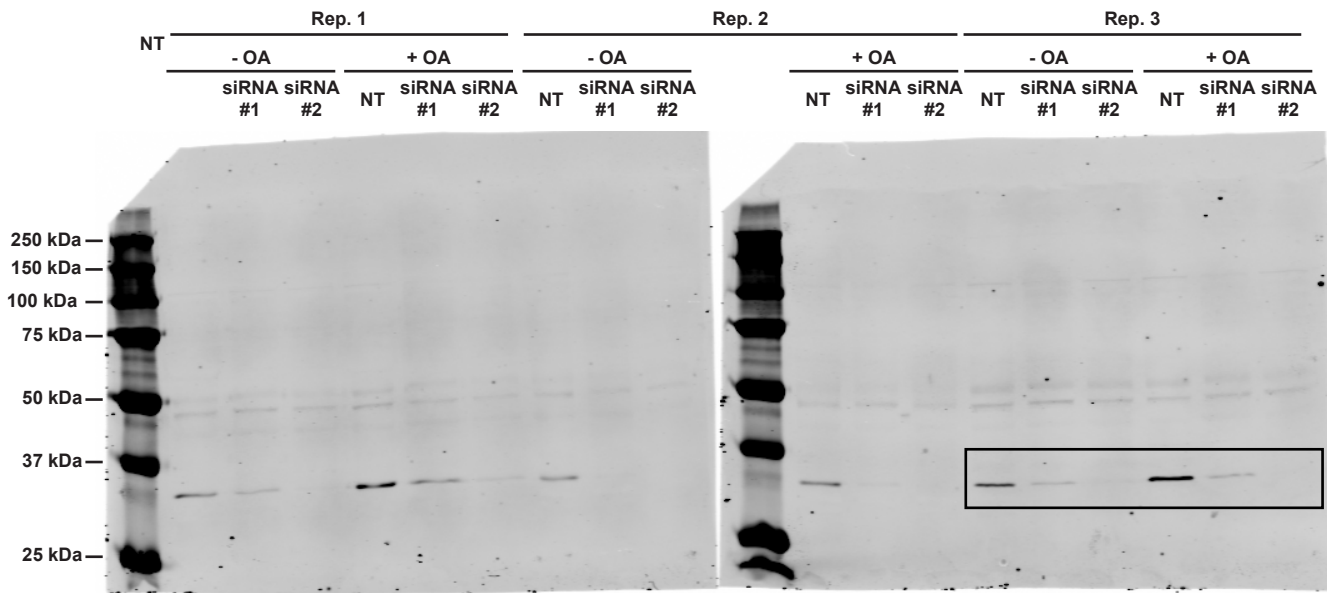

Primary antibody: Mouse anti- $\alpha$ -tubulin  
Secondary antibody Donkey anti-mouse IgG IRDye 800CW

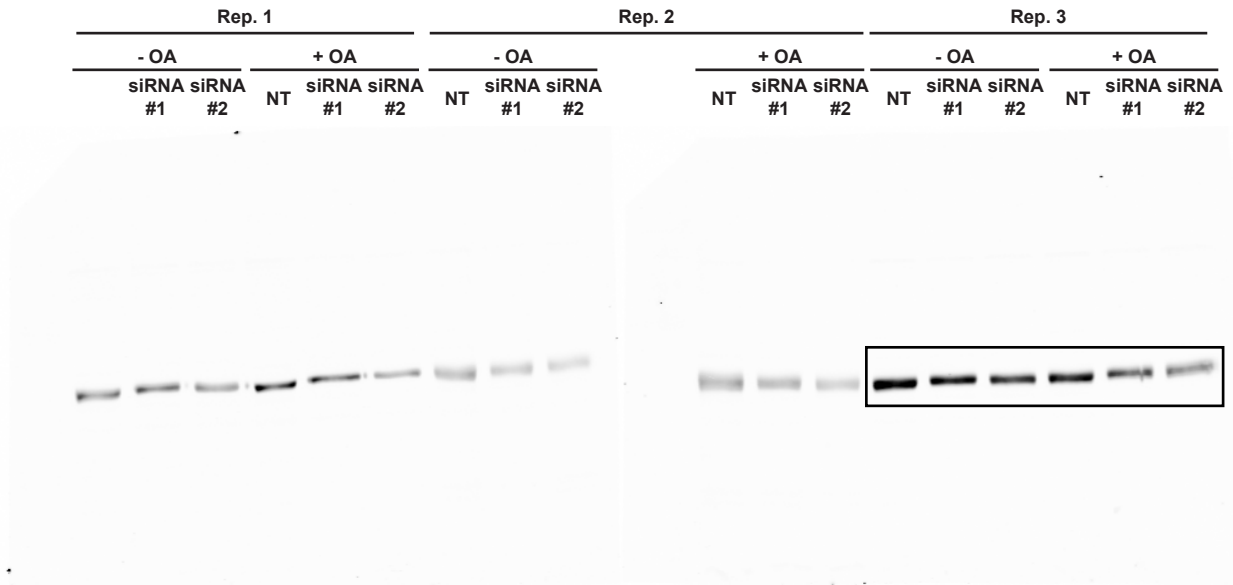

Source Data for Supplementary Figure 1
