# Supplementary figures and images for: APOE traffics to astrocyte lipid droplets and modulates triglyceride saturation and droplet size
Source: PubMed Central journal article supplement — J Cell Biol. 2024 Feb 9;223(4):e202305003. doi: 10.1083/jcb.202305003 (PMC10857907; doi:10.1083/jcb.202305003), 2024-02-09

Figure 6B

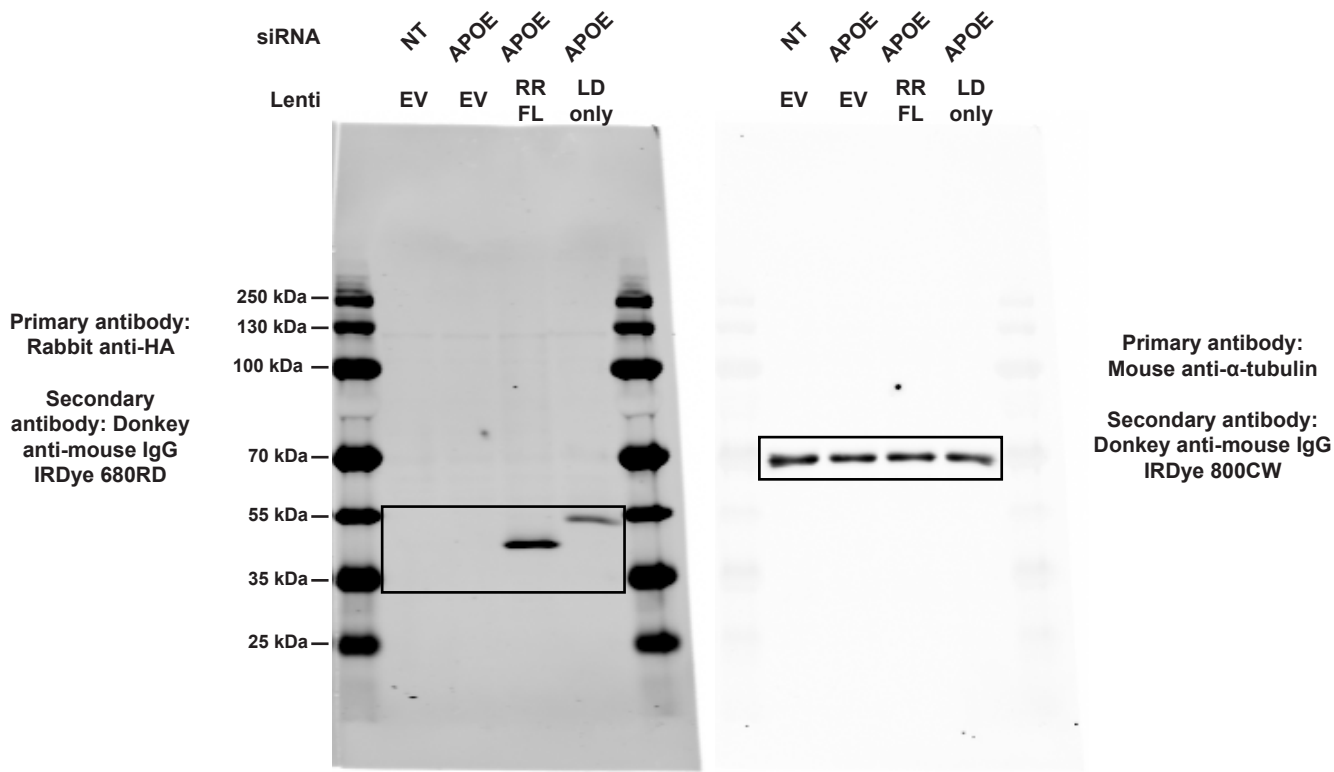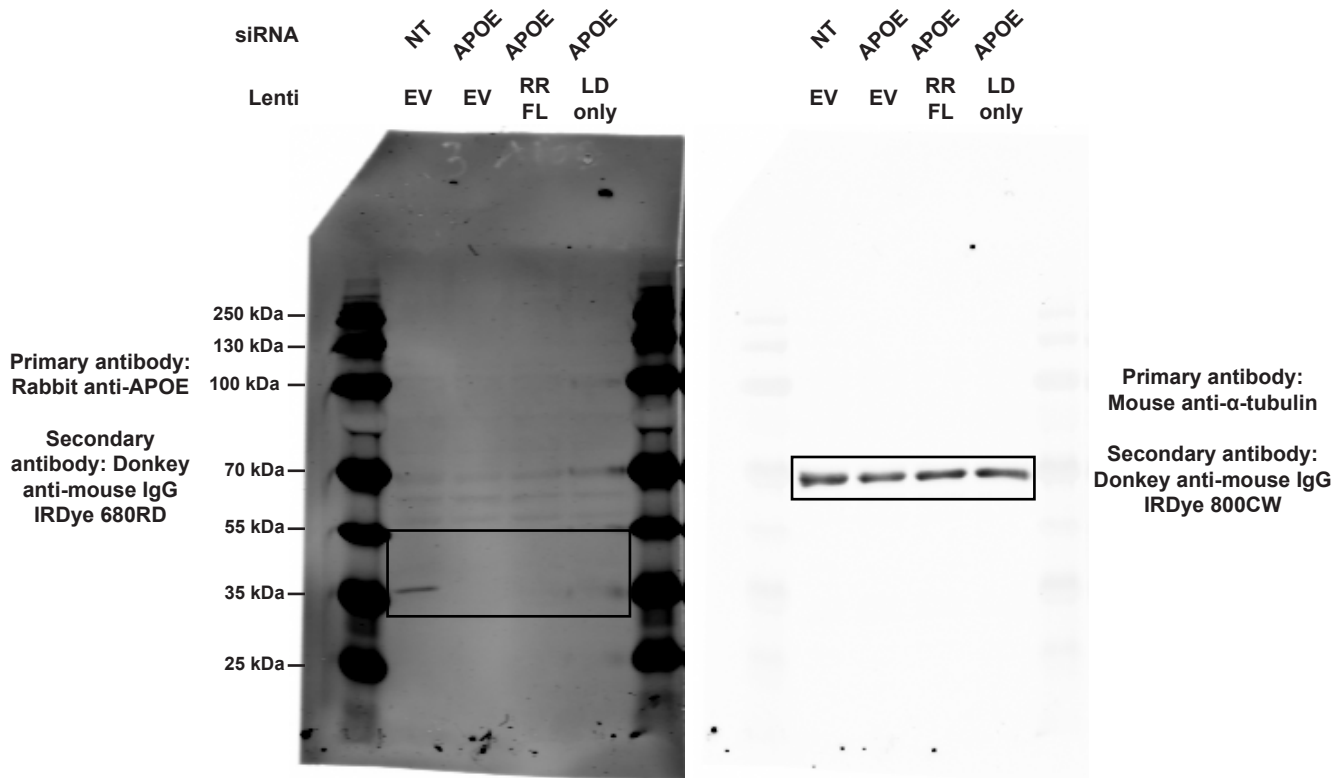

Source Data for Figure 6

Supplement: JCB_202305003_SourceDataF6.pdf [file JCB_202305003_SourceDataF6.pdf]
